1 **Deletion of an enhancer in FGF5 is associated with ectopic expression**  
2 **in goat hair follicles and the cashmere growth phenotype**

3

4 Yefang Li<sup>1,2†</sup>, Shen Song<sup>1,2,†,#a</sup>, Xuexue Liu<sup>1,2</sup>, Yanli Zhang<sup>1,2</sup>, Dandan Wang<sup>1,2</sup>, Xiaohong He<sup>1,2</sup>,

5 Qianjun Zhao<sup>1,2</sup>, Yabin Pu<sup>1,2</sup>, Weijun Guan<sup>1,2</sup>, Yuehui Ma<sup>1,2\*</sup>, Lin Jiang<sup>1,2\*</sup>

6

7 <sup>1</sup> Institute of Animal Science, Chinese Academy of Agricultural Sciences (CAAS), Beijing 100193,

8 P. R. China

9 <sup>2</sup> CAAS-ILRI Joint Laboratory on Livestock and Forage Genetic Resources, Institute of Animal

10 Science, Chinese Academy of Agricultural Sciences (CAAS), Beijing, 100193, P. R. China

11 <sup>#a</sup>Current Address: State Key Laboratory of Cardiovascular Disease Fuwai Hospital, National

12 Center for Cardiovascular Diseases, Chinese Academy of Medical Sciences and Peking Union

13 Medical College, Beijing, 100037, P. R. China

14

15 **Running title:** FGF5 indel association with cashmere growth

16 \* Corresponding author:

17 E-mail: [jianglin@caas.cn](mailto:jianglin@caas.cn) (Lin Jiang)

18 E-mail: [yuehui.ma@263.net](mailto:yuehui.ma@263.net) (Yuehui Ma)

19

20 <sup>†</sup>These authors contributed equally to this work.

21

22

23

## 24 **Abstract**

25 Research on cashmere growth has a significant effect on the production of cashmere  
26 and a profound influence on cashmere goat breeding. Whole-genome sequencing is a  
27 powerful platform to rapidly gain novel insights into the identification of genetic  
28 mechanisms underlying cashmere fiber growth. Here, we generated whole-genome  
29 sequences of 115 domestic goats from China, Nepal and Pakistan, including 51  
30 cashmere goats and 64 non-cashmere goats. We found genetically distinct clusters  
31 according to their geographic locations but genetic admixture or introgression may  
32 have occurred between the Chinese and Nepalese goats. We identified that the  
33 *fibroblast growth factor 5* gene (*FGF5*) shows a strong signature for positive selection  
34 in the cashmere goat. The 505-bp indel variant at the *FGF5* gene locus appeared to be  
35 strongly associated with cashmere growth. Functional validation showed that the  
36 insertion variant may serve as an enhancer for transcription factor binding, resulting  
37 in increased transcription of the upstream *FGF5* gene in non-cashmere goats. Our  
38 study provides useful information for the sustainable utilization and improved  
39 conservation of goat genetic resources and demonstrates that the indel mutation in the  
40 *FGF5* gene could potentially serve as a molecular marker of cashmere growth in  
41 cashmere goat breeding.

## 42 **Author summary**

43 Cashmere goats have been selected for thousands of years and have become  
44 economically significant livestock in China and other central Asian countries. The

45 mechanism of cashmere growth is not well understood because most studies have  
46 focused on the investigation of candidate genes. Here, we conducted a comprehensive  
47 whole-genome analysis for selection signatures in a total of 115 goats from 15  
48 genetically diverse goat breeds. The results revealed a strong selection signature at the  
49 *FGF5* gene locus associated with the cashmere growth phenotype. A 505-bp indel  
50 was located in the downstream region of *FGF5* and significantly separated in the  
51 cashmere goats versus non-cashmere goats. Functional effect analysis of the indel  
52 revealed that it may act as an enhancer by specifically binding transcription factors to  
53 mediate quantitative changes in *FGF5* mRNA expression. Our study illustrates how a  
54 structural mutation of the *FGF5* gene has contributed to the cashmere growth  
55 phenotype in domestic goats.

## 56 **Introduction**

57 Cashmere wool, usually simply known as cashmere, is a fiber obtained from cashmere  
58 goats, pashmina goats, and some other breeds of goat. This fiber has been used to  
59 make yarn, textiles and clothing for hundreds of years. Cashmere is closely associated  
60 with the Kashmir shawl; the word "cashmere" is derived from an anglicization of  
61 Kashmir, which occurred in the 19th century when the Kashmir shawl reached Europe  
62 from Colonial India [1]. Common usage defines the fiber as wool, but it is finer,  
63 stronger, lighter, softer and approximately three times more insulating than sheep  
64 wool [2].

65 Cashmere has been manufactured in China, Mongolia, Nepal and Pakistan for

66 thousands of years. China has the largest number and richest variety of cashmere  
67 goats, such as the Inner Mongolia cashmere, Liaoning and Tibetan varieties, and has  
68 become the largest producer of raw cashmere, estimated at 15,438 metric tons (in  
69 hair) per year [3]. Nepal has a sizeable indigenous goat population with many  
70 nondescript goats. Nepalese goat breeds exhibit enormous variations in fecundity;  
71 meat, milk and fibre production; disease resilience; and nutritional requirements.  
72 Pakistan is the fourth largest goat-producing country after China, India and Nigeria  
73 (FAOSTAT, <http://www.fao.org/faostat>). The major purposes of Pakistani goats are  
74 milk, meat and hair [4]. Moreover, some studies have suggested that a second  
75 domestication event for cashmere breeds took place in Pakistan [5].

76 Cashmere goats grow a double coat composed of the guard hair produced by primary  
77 hair follicles (PHFs) and the cashmere produced by the secondary hair follicles  
78 (SHFs) [6,7]. The staple length and diameter of hair fibers are the main indicators  
79 used to evaluate the value of cashmere. Therefore, identification of related genes and  
80 molecular mechanisms that regulate cashmere traits is of great significance. In recent  
81 years, based on the goat reference genome, several studies have attempted to  
82 characterize genetic variations of cashmere fiber traits in different goat populations  
83 using a whole-genome sequencing strategy. For instance, the genes *PRDM6*, *FGF5*  
84 [8], *LHX2*, *FGF9*, *WNT2* [9], *SGK3*, *IGFBP7*, *OXTR* [10], and so on, showed a strong  
85 selection signature for cashmere growth and length in Chinese goat populations.  
86 However, to our knowledge, few studies have identified the causative mutations of the

87 goat *FGF5* gene that underlie cashmere growth in goats. Moreover, the sample size in  
88 cashmere goat studies has been limited to Chinese goat breeds, which may not  
89 comprehensively analyze cashmere traits.

90 Here, we sequenced the whole genomes of 115 goats representing 15 breeds from  
91 habitats in China, Nepal and Pakistan. To identify the genetic basis for cashmere  
92 growth trait in cashmere goats, we performed genomic analysis of selection signatures  
93 of goats and identified that the *FGF5* gene showed some of the strongest signatures  
94 for positive selection in the cashmere goat genome. Further exploration of the *FGF5*  
95 genotypes and functional validation assays indicated that a 505-bp indel mutation  
96 located downstream from *FGF5* gene may act as an enhancer, resulting in increased  
97 mRNA expression of the *FGF5* gene; moreover, deletion of this enhancer is strongly  
98 associated with cashmere growth in cashmere goats.

## 99 **Results**

### 100 **Genomic variants**

101 We used the Illumina HiSeq platform to generate whole-genome sequencing data of  
102 115 goats sampled from China, Nepal and Pakistan (**Fig 1A**). The median genome  
103 coverage achieved across the full data set was ~5X (min=2.11X, max=7.78X),  
104 representing ~87.44% (min=78.54%, max=89.88%) base coverage per individual  
105 genome (**S2 Table**). The alignment ratio of reads to the genome was 93.57%-99.93%  
106 (**S2 Table**). Strict read alignment and genotype calling procedures allowed us to  
107 obtain a total of 17,534,538 single nucleotide polymorphisms (SNPs). The majority of

108 the autosomal SNPs were located within intergenic (11,821,678, 45.847%) and  
109 intronic (11,347,329, 44.007%) regions, with only 0.858% (221,209) located in  
110 exonic regions. Approximately 9% were present in downstream or upstream gene  
111 regulatory regions. A total of 61,164 missense SNPs and 126,811 synonymous SNPs  
112 resulted in a nonsynonymous/synonymous ratio of 0.482 (**S3 Table**).

### 113 **Genetic diversity**

114 Compared to other goats, Tibetan cashmere goats were found to show the highest  
115 genome-wide heterozygosity levels, fewer runs of homozygosity (ROHs) and the  
116 lowest linkage disequilibrium (LD) decay. However, among northern Chinese  
117 cashmere goat breeds, Liaoning cashmere goat (LiNi), Alashan cashmere goat (ALS)  
118 and Arbus cashmere goat (ABS), exhibited lower genome-wide heterozygosity, more  
119 ROHs and more LD levels, while Erlangshan cashmere goat (ELS) exhibited the  
120 opposite. This result may be related to more intensive selection breeding. Imported  
121 dairy goats and Xiangdong black (XiDo) goat showed similarly high levels of genetic  
122 diversity. The genome-wide heterozygosity levels, ROHs and LD decay were found  
123 to be lower in Nepalese highland goats but higher in Nepalese lowland goats.

124 Compared to Chinese and Nepalese goat breeds, the Pakistani goat breeds showed  
125 less level of genetic diversity, especially the Bugi Toori goat, which is likely a  
126 consequence of its inbreeding history [11] (**S4 Table, S1 and S2 Figs**).

### 127 **Phylogenetic analyses**

128 Principal component analysis (PCA) of ~3.4 million unlinked SNPs revealed that the

129 Chinese, Nepalese and Pakistani goats can be separately clustered by the first PCA  
130 axis. One Pakistani goat breed (BTR) was genetically more distant from other goat  
131 breeds (**Fig 1B, upper panel**). Restricting the analysis to Chinese goat breeds  
132 revealed four major clusters (**Fig 1B, main panel**), with the first PCA axis separating  
133 the Toggenburg (TGB) and Laoshan (LaSh) dairy goat populations, the second PCA  
134 axis separating the Tibetan cashmere goat breeds, and the third PCA axis separating  
135 the XiDo black goat from southern China (**S3 Fig**). PC1, PC2 and PC3 were able to  
136 explain genetic differences of 3.98%, 3.08% and 2.90%, respectively. The admixture  
137 analysis results were largely consistent with the PCA results as well as the similar  
138 genetic makeup among the Chinese, Nepalese and Pakistani goats (**S4 Fig**). When  
139  $K=4$ , the dairy goats, Chinese goats, BTR goat and the remaining goats were  
140 genetically distinct; when  $K=6$  and  $K=7$ , the Chinese native goats were divided into  
141 the XiDo goat from southern Chinese, the northern Chinese cashmere goats and the  
142 Tibetan cashmere goats.

143 We next investigated the ML-TreeMix tree [12] and the distance-based  
144 neighbor-joining tree [12] using *Capra ibex* as the outgroup among all the goats. The  
145 distance-based neighbor-joining tree displayed six clades according to location or  
146 specific goat trait, which were consistent with the PCA and admixture analysis results  
147 (**Fig 1C**). The reliability of the neighbor-joining tree was estimated by 100 bootstrap  
148 pseudoreplicates. The ML-TreeMix tree without migration events ( $ML=0$ ) inferred  
149 from the TreeMix analysis divided the 115 goats into six clusters, which were



150 consistent with the neighbor-joining tree results (**S5A Fig**). When  $M=1$  and  $M=2$ , the  
151 results suggested that gene exchange occurred between wild and Nepalese and  
152 Pakistani goats (**S5B and S5C Fig**); when  $M=3$ , genetic materials of LiNi flowed to  
153 XiDo (S5D Fig); and when  $M=4-6$ , genes flowed from XiDo to the TGB, LaSh and  
154 Nepalese lowland (NPL) goat breeds (**Fig 1D, S5D-S5F Fig**).

### 155 **Genome-wide selection scans for cashmere growth**

156 To detect the positive selection signatures within 100 kb sliding windows, we next  
157 scanned the cashmere goat (including TBG, TRT, LiNi, ABS, ELS, ALS and NPH)  
158 genomes relative to non-cashmere goat (including TGB, LaSh, XiDo, NPL, BTR,  
159 KMR, PTR and TPR) genomes by using three statistical methods, namely,  $F_{ST}$ ,  $\theta_{\pi}$   
160 ratio ( $\theta_{\pi\text{-noncash}}/\theta_{\pi\text{-cash}}$ ) and ZHp (**Fig 2**). The top-5% selection candidates that were  
161 common to all three statistical methods identified 982 windows, which annotated a  
162 total of 378 protein-coding genes (**S5-S8 Tables, S6 Fig**). Enrichment analyses for  
163 Gene Ontology terms revealed that the melanocortin receptor activity (GO:0004977,  
164  $P$ -value = 2.33E-06), response to stimulus (GO:0050896,  $P$ -value = 4.70E-07),  
165 developmental process (GO:0032502,  $P$ -value = 2.07E-06) and cellular metabolic  
166 process (GO:0044237,  $P$ -value = 1.07E-06) categories were significantly  
167 overrepresented (**S9 Table**). Notably, the genome window containing the *FGF5* locus  
168 was under higher selection (chromosome 6, **Fig 2**). This gene is known to be involved  
169 in hair growth. Moreover, several genes under strong selection signals are plausibly  
170 related to metabolism, inflammation, melanin precipitation and high-altitude

171 adaptation. For example, *STIM1* is an endoplasmic reticulum calcium sensor involved  
172 in regulating Ca<sup>2+</sup> and metabotropic glutamate receptor signaling in the  
173 nervous system [14,15]. The CERT protein mediates the START pathway of  
174 ceramide transport in a nonvesicular manner and the amphiphilic cavity of the  
175 START domain is optimized for specific binding of natural ceramides [16,17].  
176 *NOPI4* plays significant roles in the proliferation and migration of pancreatic cancer  
177 cells [18]. The mutations in the *SGCB* gene can lead to a loss of functional protein  
178 and result in limb-girdle muscular dystrophy disease . *MYCBP2* is a member of the  
179 PHR protein family and an E3 ubiquitin ligase, and it was shown to have important  
180 functions in developmental processes, such as axon termination and synapse  
181 formation [20]. *WARS2* has low enzyme activity, and inhibition of *WARS2* in  
182 endothelial cells reduces angiogenesis [21,22]. *MC1R* and *KIT* genes have been  
183 implicated in human and animal hair pigmentation, reflecting a role in the  
184 development and function of melanocytes [23,24]. The *DSG3* gene is responsible for  
185 the high-altitude adaptation of the Tibetan goat [25,26].

#### 186 **Annotation of variants under positive selection in *FGF5***

187 We next sought to further refine the selection targets within the *FGF5* locus by using  
188 three different methods, namely, the  $\theta_\pi$  ratio ( $\theta_{\pi\text{-noncash}}/\theta_{\pi\text{-cash}}$ ), Tajima's D and  $F_{ST}$ , and  
189 detecting the read depth. We noticed a 505-bp deletion within the most significant  
190 selection region in the *FGF5* gene (**Fig 3, S10-S13 Tables**), located at position  
191 95,454,689-95,455,189 of chromosome 6 (**Fig 4A**). The deletion variant is present in

192 cashmere goats, suggesting that it arose in an independent genetic background.

193 We designed primers spanning the breakpoint of the deletion to genotype the indel  
194 variant by gel electrophoresis, generating a 267-bp fragment in all cashmere goats but  
195 a 772-bp fragment in non-cashmere goats (**Fig 4A**). To further identify the possible  
196 functional consequences of the deletion variant, we investigated whether it showed  
197 any association with cashmere growth, extending our analysis to a more  
198 comprehensive panel of 288 goats originating from 20 populations (**S14 Table**). The  
199 results confirmed a remarkable correlation between the frequencies of the indel  
200 variant and cashmere growth. Cashmere goat breeds showed the highest allelic  
201 frequencies of deletion ( $>0.9$ ), whereas non-cashmere goat breeds showed higher  
202 allelic frequencies of insertion (nearly 0.8, **Fig 4B**).

203 Furthermore, the insertion fragment of the *FGF5* locus in humans showed a high  
204 conservation score in the 100-vertebrate animals alignment (e.g., goat, mouse, cat,  
205 dog, sheep, yak and donkey); by using UCSC database, we also found that the  
206 insertion fragment contains EP300, FOS and CEBPB transcription factors among  
207 different species [27,28] (**Fig 4C**). This finding indicated that the indel fragment has  
208 cis-regulatory effects for *FGF5* gene transcription.

### 209 **Biological significance of the indel variant**

210 Since the indel variant contains an extremely conserved FOS transcription factor  
211 binding site, we sought to functionally verify the effect of the binding site in this  
212 variant. A pair of biotin-labeled probes were designed, namely, a wildtype probe

213 containing TGAGTCA and a mutant probe excluding the site. After the binding  
214 reaction with nucleoprotein fractions from NIH/3T3 cells derived from mouse  
215 embryonic fibroblasts, the wildtype probe resulted in an obvious positive protein  
216 complex band but the mutant probe did not. The addition of either 80-fold or 160-fold  
217 cold probes to the reaction system produced a significantly thinner binding band and  
218 significantly weakened grayscale compared to those with wildtype probe. The weaker  
219 binding reaction may be due to the lower cold probe concentration or higher  
220 nucleoprotein concentration making the competitive reaction incomplete. After  
221 adding c-FOS antibody to the reaction system, a complex was obviously retained at  
222 the top of the gel (**Fig 5A**). We thus hypothesized that the indel variant can  
223 specifically bind to the FOS transcription factor, which may have important  
224 regulatory effects on upstream target genes.

225 To confirm our hypothesis, we constructed dual-luciferase recombinant plasmids  
226 either including (pGL4.23-ins) or excluding (pGL4.23-del) the indel fragment. These  
227 two recombinant vector plasmids and an empty vector were each transfected into  
228 NIH/3T3 cells together with an internal luciferase control (pGL4.74) to measure the  
229 luciferase activities. We observed significantly higher luciferase activity in cells  
230 expressing the indel fragment than both empty cells and cells expressing pGL4.23-del  
231 (**Fig 5B**). This assay suggested that the indel fragment of the *FGF5* gene functions as  
232 an enhancer to which certain transcription factors specifically bind to upregulate  
233 *FGF5* gene expression.

234 We next examined whether the indel mutation could alter the transcriptional response  
235 to cashmere length using RT-qPCR assays. The mRNA expression level of cashmere  
236 goats carrying the deletion was significantly decreased compared to that of  
237 non-cashmere goats carrying the insertion ( $P < 0.01$ , **Fig 5C**). Thus, the results of the  
238 gel shift experiment, dual-luciferase assay and RT-qPCR assays confirmed that the  
239 deletion variant disrupts the binding of transcription factors (e.g. FOS) and leads to  
240 lower expression of the *FGF5* gene in the skin of cashmere goats, while the insertion  
241 variant serves as an enhancer element that amplifies the transcriptional activity  
242 mediated by *FGF5* in non-cashmere goats.

## 243 **Discussion**

244 In this study, we sequenced the genomes of 115 goats from 15 breeds originating  
245 from China, Nepal and Pakistan. The genome data set allowed us to identify a total of  
246 ~17.5 million SNP variants, which helped us reveal the genetic diversity and  
247 population structure of these goats. In this study, most of goat breeds showed a higher  
248 diversity than others, such as the Tibetan cashmere goats, dairy goats, Erlangshan  
249 cashmere goat and Xiangdong black goat. However, the Liaoning, Alashan and Arbus  
250 cashmere goats showed lower diversity than other Chinese goats, in line with previous  
251 work [10]. The three cashmere goat breeds are famous worldwide for their fine, long  
252 fibres. This fact indicated that these breeds may have been subject to stronger  
253 intensive selection for cashmere growth. An interspecies comparison showed that  
254 Pakistani goats had a lower diversity than others. Notably, similar to previous work

255 based on the goat 50K SNP chip [10], the Bugi Toori (BTR) goat breed showed the  
256 lowest genetic diversity and a great differentiation from other Pakistani goat breeds.  
257 There may have been a historical bottleneck in history or an in-flight phenomenon in  
258 the BTR goat breed (**S1 and S2 Figs, S3 Table**).

259 Population structure analysis revealed that all the goats evaluated in this study were  
260 divided into six clusters, namely, dairy goat, southern Chinese goat, northern Chinese  
261 goat, Tibetan goat, Nepalese goat and Pakistani goat. When potential migration edges  
262 were added to the ML-TreeMix tree, gene exchange between the wild goats and  
263 Nepalese goats as well as Pakistani goats was detected among the clusters. This result  
264 may indicate that the local goats had a hybridization event with wild goats in the past.  
265 However, we observed migration edges between the Xiangdong black goat and  
266 Liaoning cashmere goat, as well as the dairy goat and Nepalese goat. There is a lower  
267 possibility of genetic admixture or introgression between the breeds because of the  
268 geographical distance between their inhabited regions. Therefore, to determine  
269 whether the southern Chinese goats underwent gene exchange with northern Chinese  
270 goat or Nepalese goats, the inclusion of more southern Chinese goat breeds is  
271 required. (**Fig 1B-1D, S3-S5 Figs**).

272 Compared with other domestic animals, goats are more adaptable to extreme  
273 environments. In China, cashmere goats are mainly distributed in the northern China  
274 and the Tibetan Plateau, where they have adapted well to the cold environment. More  
275 importantly, the fluff produced by cashmere goats provides good, warm materials for

276 the native population. Therefore, different cashmere traits are continuously formed  
277 under natural and artificial selection. This study compared the genomes of cashmere  
278 goats including those from habitats in Liaoning, Inner Mongolia, Tibetan areas and  
279 Nepalese highland areas bordering the Tibetan region with various non-cashmere  
280 goats from different areas. Scanning the genome of cashmere goat breeds for  
281 signatures of positive selection revealed the *FGF5* gene among the top candidates  
282 (**Fig 2**). The *FGF5* gene participates in the FGF pathway, which plays a central role in  
283 hair growth. Studies on the *FGF5* gene demonstrated the relation to coat hair length in  
284 mice [29], dogs [29], cats [31], humans [32], donkeys [33] and alpacas [34]. The same  
285 selection target has been described in a number of cashmere goat investigations  
286 [10,35]. In addition, disruption of the *FGF5* gene via the CRISPR/Cas9 system in  
287 cashmere goats increased the number of secondary hair follicles and enhanced the  
288 fiber length [36]. Previous studies have found a few SNP variants of the *FGF5* gene  
289 that may be associated with hair length, including a missense SNP (c.284G> T) in  
290 dogs, four SNPs (c.194C>A, c.182T>A, c.474delT and c.475A>C) in cats, two SNPs  
291 (c.433\_434delAT and c.245G> A) in donkeys and a missense SNP (c.499C>T) in  
292 alpacas [30,31,33,34]. Recently, one SNP (c.253G>A) in the 5'-UTR of *FGF5*  
293 resulted in a start codon that could lead to a premature/dysfunctional protein in  
294 Tibetan cashmere goats [35].

295 At the molecular level, our work did not reveal any missense SNPs in the exons of  
296 *FGF5* but instead revealed a significant indel variant in the region downstream of the

297 *FGF5* gene locus (**Fig 3**). Interestingly, the result of the expanded population  
298 verification showed that the 505-bp indel variant was significantly separated in  
299 cashmere goats versus non-cashmere goats. The cashmere goats mainly exhibited a  
300 deletion mutation ( $> 0.9$ ), whereas non-cashmere goats mainly exhibited an insertion  
301 mutation ( $\sim 0.8$ ). Some of the goat breeds have a small number of hybrids, such as the  
302 Nepalese lowland goat, Xiangdong black goat and Laoshan dairy goat, which may be  
303 caused by crossbreeding or altitude factors. Therefore, this result indicated that the  
304 indel variant can serve as a genetic marker for the cashmere growth trait.  
305 Furthermore, the indel mutation was found to contain a conserved binding site for the  
306 FOS transcription factor located in the mutation array and to be highly conserved in  
307 various mammals (**Fig 4**). In humans, the mutation is located downstream from the  
308 *FGF5* locus and has been identified as an enhancers according to the FANTOM5  
309 Human Enhancers database ([http://slidebase.binf.ku.dk/human\\_enhancers/](http://slidebase.binf.ku.dk/human_enhancers/)).  
310 Therefore, it is speculated that the indel variant plays a potential enhancer role in  
311 *FGF5* gene transcription.  
312 Thus, an electrophoretic mobility shift assay (EMSA), and a novel dual-luciferase  
313 reporter assay based on the expression of firefly and Renilla luciferase and mRNA  
314 expression levels of *FGF5* in goats were performed to explore the relevance of the  
315 indel variant to the *FGF5* gene. EMSA is a powerful tool for evaluating DNA-protein  
316 or RNA-protein interaction and is often used to detected the activated transcription  
317 factors (TF) that bind with DNA or RNA in the nucleus [37]. EMSAs based on



318 NIH/3T3 nuclear extracts revealed that the protein complex bound to the biotin-probe  
319 containing the wildtype FOS binding site, but did not bind to the probe that contained  
320 the mutant FOS binding site. Efficient competition for protein complex formation was  
321 observed with the inclusion of a wildtype cold probe, and a clear supershift occurred  
322 when anti-c-FOS antibody was added, which further confirmed that the FOS  
323 transcription factor can specifically bind to the indel variant. The c-FOS protein is a  
324 member of the FOS protein family [38]. The dual-luciferase reporter gene assay is  
325 widely used to study promoter activity, transcription factors, intracellular signaling,  
326 protein interactions [39], miRNA regulation [40], and target site recognition [41]. The  
327 dual reporter gene assay based on firefly (*Photinus pyralis*) and sea kidney (*Renilla*  
328 *reniformis*, also known as marine pansy) luciferases can improve experimental  
329 accuracy by normalizing results and reducing technical differences [42]. The results  
330 of this assay showed that the insertion mutation can significantly enhance promoter  
331 transcription and increase gene expression thereby verifying its enhancer function.  
332 Finally, we detected significant differences in the expression levels of the *FGF5* gene  
333 from skin tissues of cashmere goats compared with non-cashmere goat, further  
334 confirming that the insertion variant may serve as an enhancer by binding to a  
335 transcription factor to result in increased transcription of its upstream *FGF5* gene  
336 target (**Fig 5**).

337 In conclusion, our study provides a whole-genome sequence analysis of Chinese,  
338 Nepalese and Pakistani goat breeds. It includes a total of 115 individual genomes

339 spread across 15 goat breeds. The phylogenetic relationship of the 115 individuals  
340 revealed genetically distinct clusters according to their geographic locations, but  
341 genetic admixture or introgression may have occurred between Chinese and Nepalese  
342 goats. Genomic regions showing signatures of positive selection in cashmere goats  
343 revealed that the *FGF5* gene was the top candidate for the cashmere growth trait.  
344 Genotyping data from a large panel of 288 cashmere and non-cashmere goats revealed  
345 that a 505-bp indel variant, located downstream from the *FGF5* gene, is strongly  
346 associated with the cashmere length phenotype; furthermore, the deletion fragment  
347 reached close-to-fixation (~90%) frequencies in cashmere goats. Functional assays  
348 demonstrated that the insertion variant may act as an enhancer by binding to  
349 transcription factor, ultimately causing increased transcription of the upstream *FGF5*  
350 gene target. Our study provides useful information for the sustainable utilization and  
351 improved conservation of goat genetic resources. The valuable genetic marker that we  
352 identified will contribute to cashmere goat breeding to improve cashmere growth in  
353 the future.

## 354 **Materials and Methods**

355 All sample collection were approved by the Animal Welfare and ethics Committee of  
356 Institute of Animal Science, Chinese Academy of Agricultural Sciences (Permit  
357 number: IAS2019-61).

## 358 **Sample information**

359 In this study, We collected a total of 91 goats representing 44 Chinese native goats, 16

360 Nepalese goats and 31 Pakistani goats for whole-genome sequencing. In addition, we  
361 downloaded genomic dataset of 24 Chinese goats from the Sequencing Read Archive  
362 (<https://www.ncbi.nlm.nih.gov/>) under accession code PRJNA338022. 51 of the total  
363 115 goats are cashmere goats, including 8 Liaoning (LiNi), 6 Arbus (ABS), 7  
364 Erlangshan (ELS), 3 Alashan (ALS), 10 Tibetan Bange (TBG), 10 Tibetan Ritu  
365 (TRT) in China and 7 Nepalese highland (NPH) in Nepal. 64 native goats produce  
366 little cashmere, including 10 Toggenburg dairy (TGB), 7 Laoshan dairy (LaSh), 7  
367 Xiangdong black (XiDo) in China, 9 Nepalese lowland (NPL) in Nepal, 6 Bugi Toori  
368 (BTR), 9 Kamori (KMR), 11 Pateri (PTR) and 5 Tapri (TPR) in Pakistan (**S1 Table,**  
369 **Fig 1A**). A minimum of two separate flocks were sampled for each breed or location,  
370 and parent/offspring pairs were excluded.

### 371 **Whole genome sequencing analysis**

372 DNA extraction was conducted by Wizard® Genomic DNA Purification Kit  
373 (Promega). About 3µg of genomic DNA from each collected sample was sequenced  
374 on Illumina HiSeq 2000 instruments at BerryGenomics Company (Beijing, China).  
375 The 350bp sequencing library with paired-end sequencing was constructed using  
376 Illumina's standard protocol. At least 5x genome coverage and no less than 15Gb  
377 sequencing data were gained per individual. After trimming low-quality bases and  
378 adapter sequences, the clean reads were aligned against the latest goat reference  
379 genome assembly ARS1(GCF\_001704415.1) [43] using mem algorithm in  
380 Burrows-Wheeler Aligner (BWA) software [44,45]. Then the mapping results were

381 converted to BAM format by SAMtools (Version: 1.1) [46] and sorted by SortSam  
382 tools in Picard packages ([picard.sourceforge.net](http://picard.sourceforge.net), Version: 1.86). Only properly paired  
383 reads both aligned to the reference were retained for subsequent analysis (**S2 Table**).  
384 The BamCoverage (<https://github.com/BGI-shenzhen/BamCoverage/>) was used to  
385 compute the coverage and depth of sequence alignments, with the “statistics  
386 Coverage” parameter.

### 387 **Variant calling**

388 The program Genome Analysis Toolkit (GATK) [47] and SAMtools v0.1.19 [48] was  
389 used to identify SNPs, short insertions and deletions (indels). Reads were realigned  
390 around indels using the Realigner Target Creator and Indel Realigner tools from  
391 GATK, before calling SNPs with the GATK Unified Genotype and SAMtools  
392 mpileup modules, separately. SNPs were retained if matching the following five  
393 criteria: (1) the SNP confidence score (QD) was greater than or equal to 20; (2) the  
394 Phred-scaled P-value of the Fisher’s exact test to detect strand bias (FS) was inferior  
395 to equal to 10; (3) the Z-score of the Wilcoxon rank sum test of Alt vs. Ref read  
396 position bias (ReadPosRankSum) was greater or equal to -8; (4) the Qualscore of each  
397 individual SNP was larger-than-average; (5) SNPs showed only two possible alleles  
398 and a minimal allele frequency of 5%. The variants with sequence coverage and  
399 base-level values lower than the average of all sites were filtered. The 115 individual  
400 SNP VCF files were combined into the merged dataset of 17,534,538 autosomal SNPs  
401 and this merged SNP dataset was further phased to impute its own missing positions

402 using BEAGLE software [49,50].

#### 403 **Annotation**

404 SNP variants were classified into protein coding regions (overlapping a coding exon),  
405 5'UTRs and 3'UTRs (overlapping untranslated region), intronic regions (overlapping  
406 with an intron), or intergenic regions using the goat genome GTF file downloaded  
407 from Ensembl 94 ([ftp://ftp.ensembl.org/pub/release-100/gtf/capra\\_hircus/](ftp://ftp.ensembl.org/pub/release-100/gtf/capra_hircus/)) and the  
408 SNPEff software (Version: 4.0) [51]. SNPs located within protein coding regions  
409 were further binned into synonymous and non-synonymous SNPs (**S3 Table**).

#### 410 **Diversity analysis**

411 The within-population genetic diversity for goat populations was assessed using the  
412 filtered SNPs and various metrics, including observed ( $H_o$ ) and expected  
413 heterozygosity ( $H_e$ ) (**S4 Table**). The runs of homozygosity (ROH) for each goat  
414 population, including the number of ROHs and the total size within ROHs for each  
415 individual, were calculated by the command of “--homozyg-window-snp 50  
416 --homozyg-window-het 1 --homozyg-kb 500 --homozyg-density 1000” using the  
417 program PLINK v1.90b [52]. Linkage disequilibrium (LD) was computed for each  
418 population via the squared correlation coefficient ( $r^2$ ) between pairwise SNPs by the  
419 command of “-MaxDist 500 -MAF 0.005 -Het 0.9 -Miss 0.25” using the software  
420 PopLDdecay (<https://github.com/BGI-shenzhen/PopLDdecay>)

#### 421 **Phylogenetic analysis**

422 All SNPs were pruned using PLINK (Version:1.90b) and considering window sizes of  
423 1000 variants, a step size of 5, and a pairwise  $r^2$  threshold of 0.5 (--indep-pairwise  
424 1000 5 0.5). The principal component analysis (PCA) was carried out using the  
425 GCTA 1.91 software [53]. The neighbor-joining tree [13] was constructed using  
426 PHYLIP 3.68 (evolution.genetics.washington.edu/phylip.html). MEGA7 software  
427 [54] was used to visualize the phylogenetic trees. The population structure was  
428 examined via calculating Cross Value with an expectation maximization algorithm  
429 implemented in the software ADMIXTURE [55]. The number of assumed genetic  
430 clusters  $K$  ranged from 2 to 7. The population-level admixture analysis was conducted  
431 by TreeMix v.1.12 [12]. The program inferred the ML tree for 15 goat breeds (117  
432 individuals) and an outgroup (wild goat). The command was ‘-I input -bootstrap -k  
433 10000 -root outgroup -o output’. From one to 6 migration events were gradually  
434 added to the ML tree, and the command was ‘-i input -bootstrap -k 10000 -m  
435 migration events -o output’.

### 436 **Selective sweeps**

437 We scanned the cashmere goat genome for signatures of positive selection by  
438 combing three selection signature tests of the population-differentiation statistic ( $F_{ST}$ )  
439 [12], the relative nucleotide diversity ( $\theta_\pi$  ratio,  $\theta_{\pi\text{-Noncash}}/\theta_{\pi\text{-Cash}}$ ) [57] and the  
440 transformed heterozygosity score (ZHp). Genomic evidence for positive selection in  
441 response to cashmere growth was evaluated by contrasting differentiation indices  
442 between the cashmere goats versus the other goats.  $F_{ST}$  and nucleotide diversity ( $\theta_\pi$ )

443 were calculated by VCFTools [58]. The window-based ZHp approach was calculated  
444 as previously described [59]. Each test was based on a 100-kb window with 10-kb  
445 increment. We considered top 1% level for empirical percentile ( $F_{ST}>0.153$ ,  $\theta_{\pi}$   
446 ratio $>1.547$ ,  $|ZHp| >3.210$ ) windows as candidate outliers in strong selective sweeps.  
447 To annotation candidate genes harbored in these selective regions, we used Rscript to  
448 map genes in selective windows. The overlapping windows shared by top 5% highest  
449 all three tests were considered as conservative candidate selection targets and were  
450 further annotated by the genomic database BioMart (<http://www.biomart.org/>). To  
451 detect the genomic loci that are associated with cashmere length around the *FGF5*  
452 gene, we also calculated the  $\theta_{\pi}$  ratios, Tajima's  $D$  [60] and pairwise  $F_{ST}$  in 2 Mb  
453 windows between the cashmere breeds and the non-cashmere breeds. The Gene  
454 Ontology (GO) enrichment analysis of the annotated candidates were performed by  
455 using both the online G:profiler.

#### 456 **Validation in the extended population**

457 In order to predict functional candidates, this 505 bp indel variant returning the most  
458 significant signature was classified according to their evolutionary conservation  
459 scores among other mammals. Primers were designed according to the indel region of  
460 *FGF5* gene: FGF5-indel-F: 5'-GGTGATAAGCCACACGTTCAAA-3',  
461 FGF5-indel-R: 5'-TGGCTGTGATCAAACCTTACAACC -3'. The indel region was  
462 genotyped by PCR amplification using the reaction condition of the 5-min  
463 pre-denaturation, 30s-denaturation, 30s-annealing and 45s-extension for 40 cycles.

464 The genotype results were visualized by agarose gel electrophoresis. The indel of  
465 *FGF5* gene were successfully genotyped in the extended population of 288 goats,  
466 including 153 cashmere goats and 135 non-cashmere goats.

#### 467 **Electrophoretic mobility shift assay**

468 The crude nuclear protein was extracted from NIH/3T3 cells using the  
469 Nuclear/Cytoplasmic Protein Extraction Kit (SINP001, Viagene) and protein  
470 concentration was determined by the Enhanced BCA Protein Assay Kit (CHEM001,  
471 Viagene). The oligonucleotide probe of the wild allele was  
472 5'-ATGACTCTGAGTCAGTCTCCTCC-3', while the oligonucleotide probe of the  
473 mutant allele was 5'-ATGACTCGTCTCCTCC-3'. The probes were synthesized by  
474 Viagene Biotech company. EMSA was performed using a non-radioactive EMSA kit  
475 (SIDET101, Viagene) with biotin-probes, according to the user's manual instruction.  
476 Briefly, 4 µg nuclear protein was incubated with poly dI:dC for 20 min at room  
477 temperature in binding reaction buffer. Then biotin-probe was added to and incubated  
478 with the mixture at room temperature for at least 20 min. The reaction mixtures were  
479 separated by electrophoresis by 8% non-denaturing polyacrylamide gel in 0.5×  
480 Tris-borate-EDTA buffer at 120V for 1h. The gel was transferred onto a pre-soaked  
481 nylon-membrane at 390 mA for 40min and afterward, the energy of 800 mJ is applied  
482 for crosslinking DNA to nylon membrane using CL-1000 Ultraviolet Crosslinker  
483 (UVP, UK). Finally, the complexes bands were visualized by chemiluminescent  
484 detection. Competition reaction with a 80-fold and 160-fold molar excess of unlabeled



485 oligonucleotide were performed to confirm the specificity of the DNA-protein  
486 complex. For the supershift experiment, 2 $\mu$ g of anti-c-fos antibodies (sc-8047X, Santa  
487 Cruz) were added to the mixture.

#### 488 **Dual-luciferase reporter assay**

489 NIH/3T3 cells were propagated in the medium of Roswell Park Memorial Institute  
490 1640 (RPMI 1640), supplemented with 10% heat-inactivated fetal bovine serum and  
491 penicillin (0.2 U/ml)/streptomycin (0.2  $\mu$ g/ml)/L-glutamine (0.2  $\mu$ g/ml) (Gibco, USA).  
492 The 772-bp and 267-bp fragment of *FGF5* indel region were cloned into the pGL4.23  
493 vector (Promega, USA) expressing Firefly luciferase gene, respectively. We thus  
494 generated two recombinant vectors pGL4.23-ins (containing 505-bp insertion) and  
495 pGL4.23-del (containing the deletion). Each plasmid was co-transfected into NIH/3T3  
496 cells with the internal control vector pGL4.74 expressing Renilla luciferase gene by  
497 Lipofectamine<sup>TM</sup> 3000 (Invitrogen, America) according to the manufacturer's  
498 instruction. The firefly luminescence signal (FiLuc) and Renilla luciferase signal  
499 (hRLuc) of NIH/3T3 cells were measured for each transfection on a multi-function  
500 microplate reader (Tecan Infinite 200 Pro) using the Dual-Luciferase Reporter Assay  
501 System (E1910, Promega) after 24h transfection.

#### 502 **RT-qPCR quantification**

503 The total RNA was extracted from Inner Mongolia Alashan cashmere goats and Dazu  
504 black goats using RNA extraction Kit (Promega), and RNA quality and concentration  
505 were measured on an Agilent 2100 Bioanalyzer (Germany). The RIN value of

506 samples greater than 8.0 were used for RT-qPCR analysis. The cDNA was synthesized  
507 using PrimeScript RT reagent kit with gDNA Eraser (Takara, Dalian, China) in a 20  
508  $\mu$ l reaction mixture following the manufacturer's instruction. The expression levels of  
509 FGF5 gene was normalized against UBC reference genes [61,62]. The primers used in  
510 the RT-qPCR experiment were showed in **S11 Table**. The RT-qPCR was performed  
511 using TB Green Premix Ex Taq (Takara, Dalian, China). The qPCR reaction program  
512 was set as follow: 95 °C 30 s, 40 cycles of 5 s at 95 °C and 34 s at 60 °C. The qPCRs  
513 were run of both technical and biological replicates (n=3) using an ABI7500 sequence  
514 detection system (Applied Biosystems by Life Technologies, Darmstadt, Germany).  
515 Fold expression changes were determined using a standard  $2^{-\Delta\Delta C_T}$  method that  
516 compares  $C_T$  (cycle threshold) values of a reference gene to the gene of interest for  
517 the  $\Delta C_T$  calculation and compares the  $\Delta C_T$  value of a reference sample with the  
518 sample of interest for the  $\Delta\Delta C_T$  calculation [63].

## 519 **Acknowledgments**

520 The authors are grateful to all goat owners and breeding organizations who donated  
521 samples. We thank members of the Nextgen project for sharing their data. We thank  
522 the National Germplasm Center of Domestic Animal Resources of IAS.

523

524 **References:**

- 525 1. Britannica E. cashmere: Encyclopædia Britannica; 2008.
- 526 2. Von Bergen W. What the manufacturer requires in raw wool. 1963.
- 527 3. National Bureau of Statistics of China. China statistical yearbook 2019. China Statistics Press.
- 528 2019.
- 529 4. Khan MS, Rehman ZU, Khan MA, Ahmad S. Genetic resources and diversity in Pakistani goats.
- 530 Pak Vet J. 2008; 28.
- 531 5. Porter V. Goats of the world.: Farming Press; 1996.
- 532 6. Stenn KS, Paus R. Controls of hair follicle cycling. *Physiol Rev.* 2001; 81: 449-494.
- 533 7. Ansari-Renani HR, Ebadi Z, Moradi S, Baghershah HR, Ansari-Renani MY, Ameli SH.
- 534 Determination of hair follicle characteristics, density and activity of Iranian cashmere goat
- 535 breeds. *Small Ruminant Res.* 2011; 95: 128-132.
- 536 8. Zhang B, Chang L, Lan X, Asif N, Guan F, Fu D, et al. Genome-wide definition of selective
- 537 sweeps reveals molecular evidence of trait-driven domestication among elite goat (*Capra*
- 538 *species*) breeds for the production of dairy, cashmere, and meat. *Gigascience.* 2018; 7: y105.
- 539 9. Wang X, Liu J, Zhou G, Guo J, Yan H, Niu Y, et al. Whole-genome sequencing of eight goat
- 540 populations for the detection of selection signatures underlying production and adaptive traits.
- 541 *Sci Rep-Uk.* 2016; 6: 38932.
- 542 10. Li X, Su R, Wan W, Zhang W, Jiang H, Qiao X, et al. Identification of selection signals by

- 543 large-scale whole-genome resequencing of cashmere goats. *Sci Rep-Uk*. 2017; 7: 1-10.
- 544 11. Kumar C, Song S, Dewani P, Kumar M, Parkash O, Ma Y, et al. Population structure, genetic  
545 diversity and selection signatures within seven indigenous Pakistani goat populations. *Anim*  
546 *Genet*. 2018; 49: 592-604.
- 547 12. Pickrell JK, Pritchard JK. Inference of population splits and mixtures from genome-wide allele  
548 frequency data. *Plos Genet*. 2012; 8: e1002967.
- 549 13. SAITOU N. The neighbor-joining methods: A new method for reconstructing phylogenetic  
550 trees. *Mol.biol.evol*. 1987; 4.
- 551 14. Hartmann J, Karl RM, Alexander RP, Adelsberger H, Brill MS, Rühlmann C, et al. STIM1  
552 controls neuronal Ca<sup>2+</sup> signaling, mGluR1-dependent synaptic transmission, and cerebellar  
553 motor behavior. *Neuron*. 2014; 82: 635-644.
- 554 15. Majewski Ł, Maciąg F, Boguszewski PM, Wasilewska I, Wiera G, Wójtowicz T, et al.  
555 Overexpression of STIM1 in neurons in mouse brain improves contextual learning and  
556 impairs long-term depression. *Biochim Biophys Acta Mol Cell Res*. 2017; 1864: 1071-1087.
- 557 16. Kudo N, Kumagai K, Tomishige N, Yamaji T, Wakatsuki S, Nishijima M, et al. Structural basis  
558 for specific lipid recognition by CERT responsible for nonvesicular trafficking of ceramide.  
559 *Proc Natl Acad Sci U S A*. 2008; 105: 488-493.
- 560 17. Bandet CL, Mahfouz R, Véret J, Sotiropoulos A, Poirier M, Giussani P, et al. Ceramide  
561 Transporter CERT Is Involved in Muscle Insulin Signaling Defects Under Lipotoxic  
562 Conditions. *Diabetes*. 2018; 67: 1258-1271.

- 563 18. Zhou B, Wu Q, Chen G, Zhang TP, Zhao YP. NOP14 promotes proliferation and metastasis of  
564 pancreatic cancer cells. *Cancer Lett.* 2012; 322: 195-203.
- 565 19. Giugliano T, Fanin M, Savarese M, Piluso G, Angelini C, Nigro V. Identification of an  
566 intragenic deletion in the SGCB gene through a re-evaluation of negative next generation  
567 sequencing results. *Neuromuscul Disord.* 2016; 26: 367-369.
- 568 20. Pierre S, Zhang DD, Suo J, Kern K, Tarighi N, Scholich K. Myc binding protein 2 suppresses  
569 M2-like phenotypes in macrophages during zymosan-induced inflammation in mice. *Eur J*  
570 *Immunol.* 2018; 48: 239-249.
- 571 21. Wang M, Sips P, Khin E, Rotival M, Sun X, Ahmed R, et al. Wars2 is a determinant of  
572 angiogenesis. *Nat Commun.* 2016; 7: 12061.
- 573 22. Agnew T, Goldsworthy M, Aguilar C, Morgan A, Simon M, Hilton H, et al. A Wars2 Mutant  
574 Mouse Model Displays OXPHOS Deficiencies and Activation of Tissue-Specific Stress  
575 Response Pathways. *Cell Rep.* 2018; 25: 3315-3328.
- 576 23. Chen S, Zhu B, Yin C, Liu W, Han C, Chen B, et al. Palmitoylation-dependent activation of  
577 MC1R prevents melanomagenesis. *Nature.* 2017; 549: 399-403.
- 578 24. Moss KG, Toner GC, Cherrington JM, Mendel DB, Laird AD. Hair depigmentation is a  
579 biological readout for pharmacological inhibition of KIT in mice and humans. *J Pharmacol*  
580 *Exp Ther.* 2003; 307: 476-480.
- 581 25. Kumar C, Song S, Jiang L, He X, Zhao Q, Pu Y, et al. Sequence Characterization of DSG3 Gene  
582 to Know Its Role in High-Altitude Hypoxia Adaptation in the Chinese Cashmere Goat. *Front*

- 583 Genet. 2018; 9: 553.
- 584 26. Song S, Yao N, Yang M, Liu X, Dong K, Zhao Q, et al. Exome sequencing reveals genetic  
585 differentiation due to high-altitude adaptation in the Tibetan cashmere goat (*Capra hircus*).  
586 *Bmc Genomics*. 2016; 17: 122.
- 587 27. Gerstein MB, Kundaje A, Hariharan M, Landt SG, Yan K, Cheng C, et al. Architecture of the  
588 human regulatory network derived from ENCODE data. *Nature*. 2012; 489: 91-100.
- 589 28. Wang J, Zhuang J, Iyer S, Lin X, Whitfield TW, Greven MC, et al. Sequence features and  
590 chromatin structure around the genomic regions bound by 119 human transcription factors.  
591 *Genome Res*. 2012; 22: 1798-1812.
- 592 29. Hébert JM, Rosenquist T, Götz J, Martin GR. FGF5 as a regulator of the hair growth cycle:  
593 evidence from targeted and spontaneous mutations. *Cell*. 1994; 78: 1017-1025.
- 594 30. Housley D, Venta PJ. The long and the short of it: evidence that FGF5 is a major determinant of  
595 canine 'hair'-itability. *Anim Genet*. 2006; 37: 309-315.
- 596 31. Drögemüller C, Rüfenacht S, Wichert B, Leeb T. Mutations within the FGF5 gene are  
597 associated with hair length in cats. *Anim Genet*. 2007; 38: 218-221.
- 598 32. Higgins CA, Petukhova L, Harel S, Ho YY, Drill E, Shapiro L, et al. FGF5 is a crucial regulator  
599 of hair length in humans. *Proceedings of the National Academy of Sciences*. 2014; 111:  
600 10648-10653.
- 601 33. Legrand R, Tiret L, Abitbol M. Two recessive mutations in FGF5 are associated with the  
602 long-hair phenotype in donkeys. *Genet Sel Evol*. 2014; 46: 1-7.

- 603 34. Pallotti S, Pediconi D, Subramanian D, Molina MG, Antonini M, Morelli MB, et al. Evidence of  
604 post-transcriptional readthrough regulation in FGF5 gene of alpaca. *Gene*. 2018; 647: 121-128.
- 605 35. Guo J, Zhong J, Li L, Zhong T, Wang L, Song T, et al. Comparative genome analyses reveal the  
606 unique genetic composition and selection signals underlying the phenotypic characteristics of  
607 three Chinese domestic goat breeds. *Genet Sel Evol*. 2019; 51: 70.
- 608 36. Wang X, Cai B, Zhou J, Zhu H, Niu Y, Ma B, et al. Disruption of FGF5 in cashmere goats using  
609 CRISPR/Cas9 results in more secondary hair follicles and longer fibers. *Plos One*. 2016; 11:  
610 e164640.
- 611 37. Garner MM, Revzin A. The use of gel electrophoresis to detect and study nucleic acid—protein  
612 interactions. *Trends Biochem Sci*. 1986; 11: 395-396.
- 613 38. Milde-Langosch K. The Fos family of transcription factors and their role in tumourigenesis. *Eur*  
614 *J Cancer*. 2005; 41: 2449-2461.
- 615 39. Jia S, Peng J, Gao B, Chen Z, Zhou Y, Fu Q, et al. Relative quantification of protein-protein  
616 interactions using a dual luciferase reporter pull-down assay system. *Plos One*. 2011; 6:  
617 e26414.
- 618 40. Jin Y, Chen Z, Liu X, Zhou X. Evaluating the microRNA targeting sites by luciferase reporter  
619 gene assay. *Methods Mol Biol*. 2013; 936: 117-127.
- 620 41. Jin Y, Chen Z, Liu X, Zhou X. Evaluating the microRNA targeting sites by luciferase reporter  
621 gene assay. *MicroRNA protocols*: Springer. 2013. pp. 117-127.
- 622 42. Stables J, Scott S, Brown S, Roelant C, Burns D, Lee MG, et al. Development of a dual

- 623 glow-signal firefly and Renilla luciferase assay reagent for the analysis of G-protein coupled  
624 receptor signalling. *J Recept Sig Transd.* 1999; 19: 395-410.
- 625 43. Bickhart DM, Rosen BD, Koren S, Sayre BL, Hastie AR, Chan S, et al. Single-molecule  
626 sequencing and chromatin conformation capture enable de novo reference assembly of the  
627 domestic goat genome. *Nat Genet.* 2017; 49: 643-650.
- 628 44. Li H, Durbin R. Fast and accurate short read alignment with Burrows–Wheeler transform.  
629 *Bioinformatics.* 2009; 25: 1754-1760.
- 630 45. Li H. Aligning sequence reads, clone sequences and assembly contigs with BWA-MEM. arXiv  
631 preprint arXiv:1303.3997. 2013.
- 632 46. Li H, Handsaker B, Wysoker A, Fennell T, Ruan J, Homer N, et al. The sequence  
633 alignment/map format and SAMtools. *Bioinformatics.* 2009; 25: 2078-2079.
- 634 47. McCormick RF, Truong SK, Mullet JE. RIG: recalibration and interrelation of genomic  
635 sequence data with the GATK. *G3: Genes, Genomes, Genetics.* 2015; 5: 655-665.
- 636 48. Zhou Z, Jiang Y, Wang Z, Gou Z, Lyu J, Li W, et al. Resequencing 302 wild and cultivated  
637 accessions identifies genes related to domestication and improvement in soybean. *Nat*  
638 *Biotechnol.* 2015; 33: 408-414.
- 639 49. Browning SR, Browning BL. Rapid and accurate haplotype phasing and missing-data inference  
640 for whole-genome association studies by use of localized haplotype clustering. *The American*  
641 *Journal of Human Genetics.* 2007; 81: 1084-1097.
- 642 50. Browning BL, Browning SR. Genotype imputation with millions of reference samples. *The*



- 643 American Journal of Human Genetics. 2016; 98: 116-126.
- 644 51. Cingolani P, Platts A, Wang LL, Coon M, Nguyen T, Wang L, et al. A program for annotating  
645 and predicting the effects of single nucleotide polymorphisms, SnpEff. *Fly*. 2012; 6: 80-92.
- 646 52. Chang CC, Chow CC, CAM TL, Shashaank V, Purcell SM, Lee JJ. Second-generation PLINK:  
647 rising to the challenge of larger and richer datasets. *Gigascience*. 2015: 1.
- 648 53. Yang J, Lee SH, Goddard ME, Visscher PM. GCTA: a tool for genome-wide complex trait  
649 analysis. *Am J Hum Genet*. 2011; 88: 76-82.
- 650 54. Kumar S, Stecher G, Tamura K. MEGA7: molecular evolutionary genetics analysis version 7.0  
651 for bigger datasets. *Mol Biol Evol*. 2016; 33: 1870-1874.
- 652 55. Alexander DH, Novembre J, Lange K. Fast model-based estimation of ancestry in unrelated  
653 individuals. *Genome Res*. 2009.
- 654 56. Alexander DH, Novembre J, Lange K. Fast model-based estimation of ancestry in unrelated  
655 individuals. *Genome Res*. 2009; 19: 1655-1664.
- 656 57. Nei M, Li WH. Mathematical model for studying genetic variation in terms of restriction  
657 endonucleases. *Proc Natl Acad Sci U S A*. 1979; 76: 5269-5273.
- 658 58. Danecek P, Auton A, Abecasis G, Albers CA, Banks E, Depristo MA, et al. The variant call  
659 format and VCFtools. *Bioinformatics*. 2011; 27: 2156-2158.
- 660 59. Rubin CJ, Zody MC, Eriksson J, Meadows JR, Sherwood E, Webster MT, et al. Whole-genome  
661 resequencing reveals loci under selection during chicken domestication. *Nature*. 2010; 464:

662 587-591.

663 60. Tajima F. Statistical method for testing the neutral mutation hypothesis by DNA polymorphism.

664 Genetics. 1989; 123: 585-595.

665 61. Bai WL, Yin RH, Yin RL, Jiang WQ, Wang JJ, Wang ZY, et al. Selection and validation of

666 suitable reference genes in skin tissue of Liaoning cashmere goat during hair follicle cycle.

667 Livest Sci. 2014; 161: 28-35.

668 62. He X, Chao Y, Zhou G, Chen Y. Fibroblast growth factor 5-short (FGF5s) inhibits the activity

669 of FGF5 in primary and secondary hair follicle dermal papilla cells of cashmere goats. Gene.

670 2016; 575: 393-398.

671 63. Livak KJ, Schmittgen TD. Analysis of relative gene expression data using real-time quantitative

672 PCR and the  $2^{-\Delta\Delta C(T)}$  Method. Methods. 2001; 25: 402.

673

674

675

676

## 677 **Supporting information**

### 678 **S1 Fig. Distribution of mean size and number of ROH.**

679 TGB, Toggenburg dairy goat from Heilongjiang; LaSh, Laoshan dairy goat from

680 Shandong; XiDo, Xiangdong black goat from Hunan; LiNi, Liaoning cashmere goat

681 from Liaoning; ABS, Arbus cashmere goat; ELS, Erlangshan cashmere goat; ALS,  
682 Alashan cashmere goat from Inner Mongolia; TBG, Tibetan Bangor cashmere goat;  
683 TRT, Tibetan Ritu cashmere goat from Tibet; NPH, Nepalese Highland goat; NPL,  
684 Nepalese Lowland goat; TPR, Tapri goat; KMR, Kamori goat; PTR, Pateri goat; BTR,  
685 Bugi Toori goat.

686 **S2 Fig. Decay of LD in the goat genome for each breed.**

687 **S3 Fig. PCA result of the first and third components of Chinese goats.**

688 **S4 Fig. Genetic population structure of the 115 goats conducted by Admixture.**

689 The length of each colored segment represents the proportion of the individual  
690 genome inferred from ancestral populations ( $K=2-7$ ).

691 **S5 Fig. Migration analysis of 115 goats by Treemix software.**

692 (A-F) panels represent models of population affinities assuming 0-3 and 5-6 migration  
693 edges in TreeMix, respectively. The inferred migration weight is provided by the  
694 color of the arrow displayed.

695 **S6 Fig. The overlapped regions for selection signatures.**

696 The overlapped regions by top 5% highest  $F_{ST}$  and  $\theta_{\pi}$  ratio (noncash/cash) and ZHp  
697 for cashmere goats.

698 **S1 Table. Population distribution.**

699 **S2 Table. Mapping coverage and depth.**

700 **S3 Table. SNP summary statistics in the goat breeds.**

701 **S4 Table. Genome-wide heterozygosity of goat breeds.**

702 **S5 Table.  $F_{ST}$  selection signatures with the windows by top 1% highest.**

703 **S6 Table.  $\theta\pi$  selection signatures with the windows by top 1% highest.**

704 **S7 Table. ZHp selection signatures with the windows by top 1% highest.**

705 **S8 Table. Overlapped regions by top 5% highest  $F_{ST}$ ,  $\theta\pi$  and ZHp selection**  
706 **signatures.**

707 **S9 Table. Enrichment analyses of GO terms.**

708 **S10 Table. Populations for validation.**

709 **S11 Table. Primers for qPCR.**

710 **S12 Table.  $\theta\pi$  values of genomic regions around gene *FGF5*.**

711 **S13 Table. Tajima' $D$  values of genomic regions around gene *FGF5*.**

712 **S14 Table.  $F_{ST}$  values of genomic regions around gene *FGF5*.**

713 **S15 Table. Depth values of genomic regions around gene *FGF5*.**

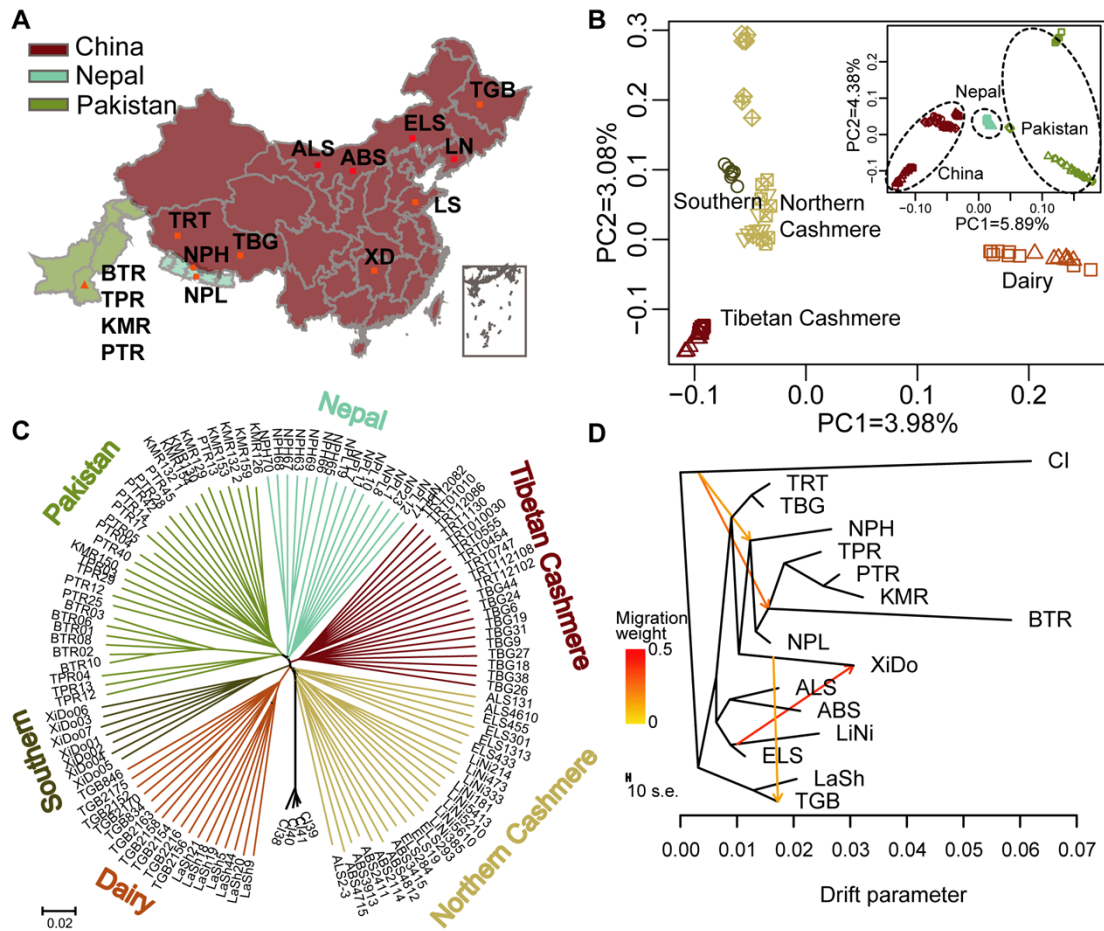

714

715 **Fig 1. Geographic distribution, genetic structure of Chinese, Nepalese and Pakistani goat**  
716 **breeds.**

717 (A) The geographic distribution of 15 goat populations. The red color represent Chinese goats  
718 (TGB, Toggenburg dairy goat from Heilongjiang; LaSh, Laoshan dairy goat from Shandong;  
719 LiNi, Liaoning cashmere goat from Liaoning; ABS, Arbus cashmere goat; ELS, Erlangshan  
720 cashmere goat; ALS, Alashan cashmere goat from Inner Mongolia; TBG, Tibetan Bangor  
721 cashmere goat; TRT, Tibetan Ritu cashmere goat from Tibet; XiDo, Xiangdong black goat from  
722 Hunan). The blue color represents Nepalese goats (NPH, Nepalese Highland goat; NPL, Nepalese  
723 Lowland goat). The green color represents Pakistani goats (BTR, Bugi Toori goat; KMR, Kamori  
724 goat; PTR, Pateri goat; TPR, Tapri goat).

725 (inner plot) and Chinese goats (outer plot). The fraction of the total variance explained is reported  
726 on each individual axis between parentheses. (C) The neighbor-joining tree of the goat breeds,  
727 with *Capra ibex* as the outgroup. Bootstrap reported was close to 100%. (D) The ML-TreeMix  
728 tree of all goats, with *Capra ibex* as the outgroup, assuming four migration events. Migration  
729 arrows are colored according to their weights. Horizontal branch lengths are proportional to the  
730 amount of genetic drift parameter that has occurred on the branch. The drift parameter measures  
731 the variance in allele frequency estimated along each branch of the tree. The yellow and orange  
732 lines indicate the instantaneous admixtures, whereas arrows denote continuous (unidirectional)  
733 genes flow.

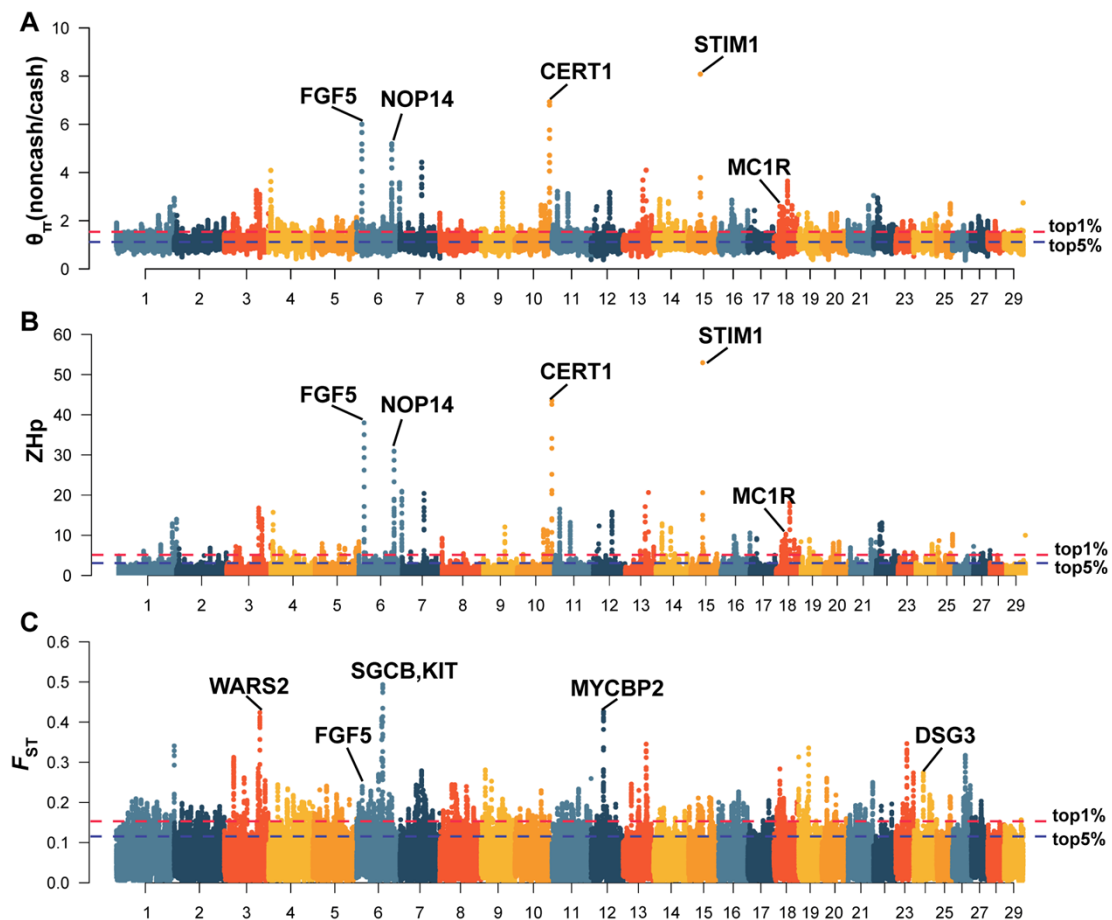

734

735 **Fig 2. Positive selection scans for cashmere growth.**

736 Cashmere goats are compared with non-cashmere goats. The nucleotide diversity  $\theta\pi$  ratio  
737 ( $\theta\pi$ -noncash/ $\theta\pi$ -cash) (A), the transformed heterozygosity score ZHp (B) and the population  
738 genetic differentiation  $F_{ST}$  values (C) are calculated within 100 kb sliding windows (step size 10  
739 kb). The significance threshold of a selection signature was arbitrarily set to the top 5% percentile  
740 outliers for each individual test and is indicated with blue horizontal dashed lines. The red  
741 horizontal dashed lines delineate the top 1% quantile.

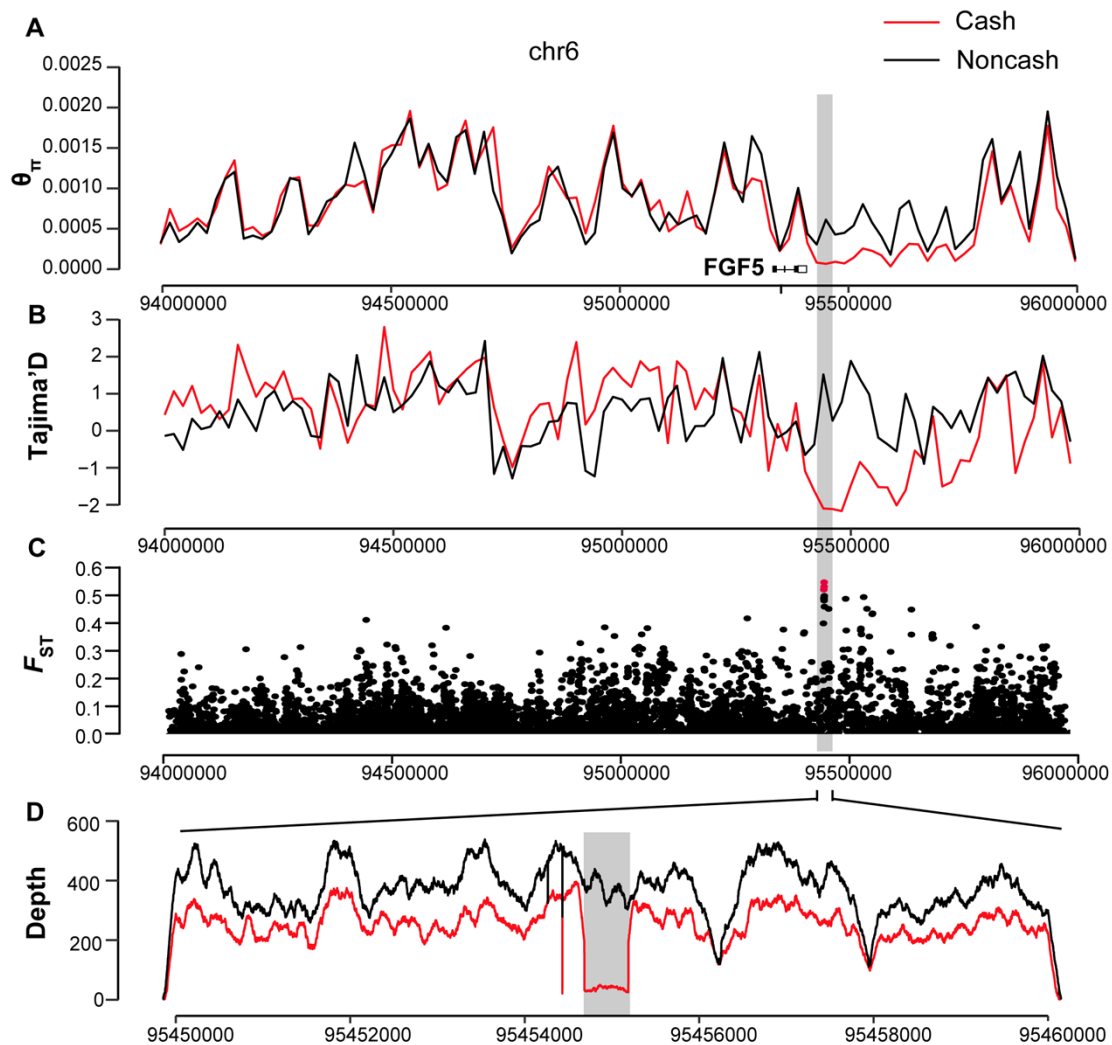

742

743

744 **Fig 3. The strongest positive selection signature around the *FGF5* peak.**

745 The  $\theta_\pi$  ratio (A), Tajima's  $D$  (B) and  $F_{ST}$  value (C) are plotted against the peak position from  
 746 94.0 Mb to 96.0 Mb, and the read depth value (D) is plotted against the peak position from 95.45  
 747 Mb to 95.46 Mb on chromosome 6. Both  $\theta_\pi$  ratio and Tajima's  $D$  values were based on a 20 kb  
 748 window and a 20 kb step. The red and the black lines represent cashmere and non-cashmere goats,  
 749 respectively. The gray columns represent the strongest positive selection signature in the region  
 750 considered. The small black boxes and short lines represent the gene structure of *FGF5*.

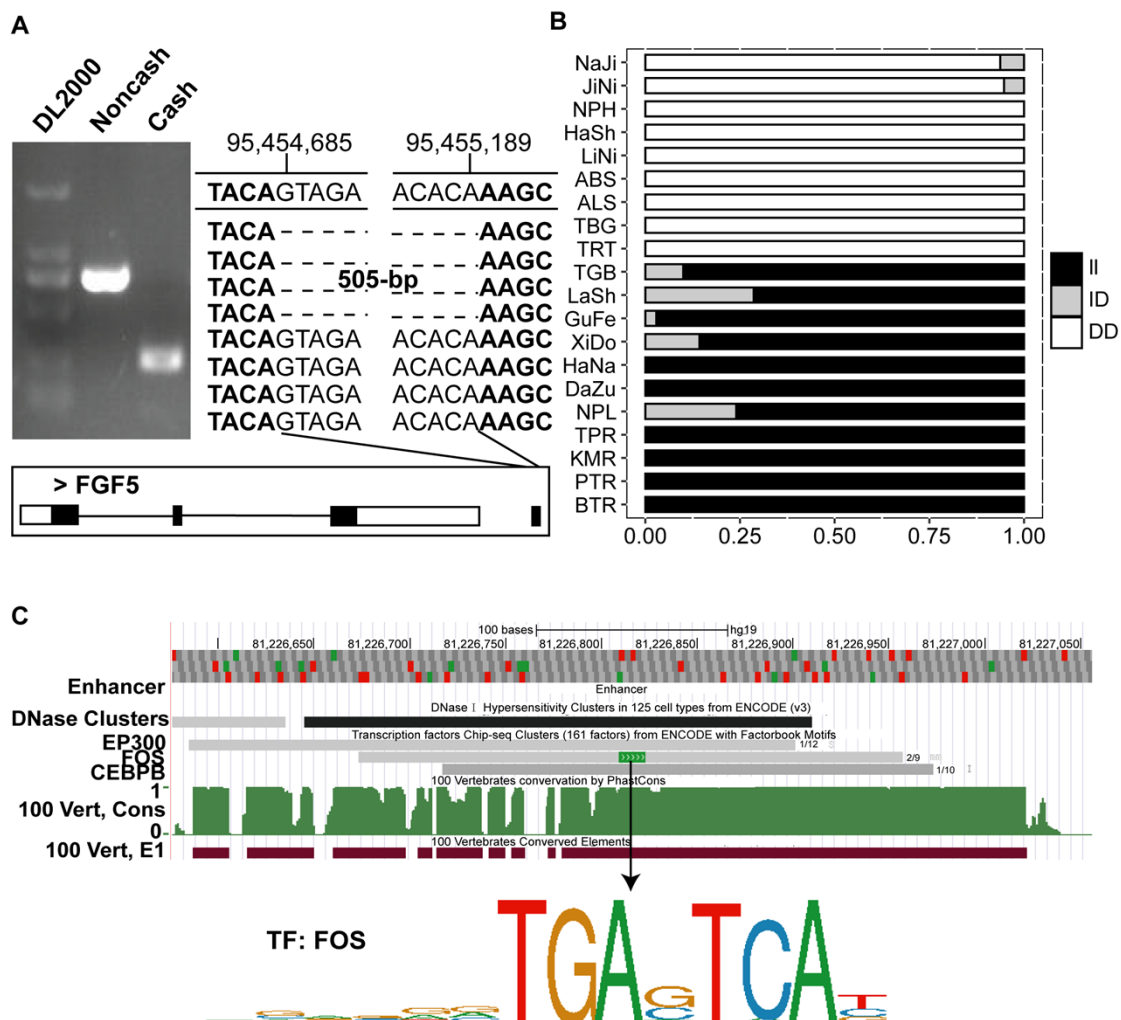

751  
 752 **Fig 4. Annotation of the indel variant in the *FGF5* gene showing positive selection**



753 **signatures.**

754 (A) The PCR amplification of 505-bp indel variant, generating a 267-bp fragment in all cashmere  
755 goats while a 772-bp fragment in non-cashmere goats. The indel is located at position  
756 95,454,689-95,455,189 of chromosome 6 in the downstream of *FGF5* gene. (B) Genotypes of  
757 indel were determined in a larger population ( $N = 288$  goats). II represents homozygous insertion  
758 genotype; ID represents heterozygous indel genotype; DD represents homozygous deletion  
759 genotype. Cashmere goat breeds include NaJi (Nanjiang cashmere goat), JiNi (Jining grey goat),  
760 NPH (Nepalese highland goat), HaSh (Hanshan white cashmere goat), LiNi (Liaoning cashmere  
761 goat), ABS (Arbus cashmere goat), ALS (Alashan cashmere goat), TBG (Tibetan Bangor  
762 cashmere goat) and TRT (Tibetan Ritu cashmere goat). Non-cashmere goat breeds include TGB  
763 (Toggenburg dairy goat), LaSh (Laoshan dairy goat), GuFe (Guangfeng goat), XiDo (Xiangdong  
764 black goat), HaNa (Hainan black goat), DaZu (Dazu black goat), NPL (Nepalese lowland goat),  
765 BTR (Bugi Toori goat), KMR (Kamori goat), PTR (Pateri goat) and TPR (Tapri goat). (C) The  
766 insertion fragment of *FGF5* gene in humans contains a highly conserved FOS transcription factor  
767 binding site (TGAGTCA) in the UCSC database.

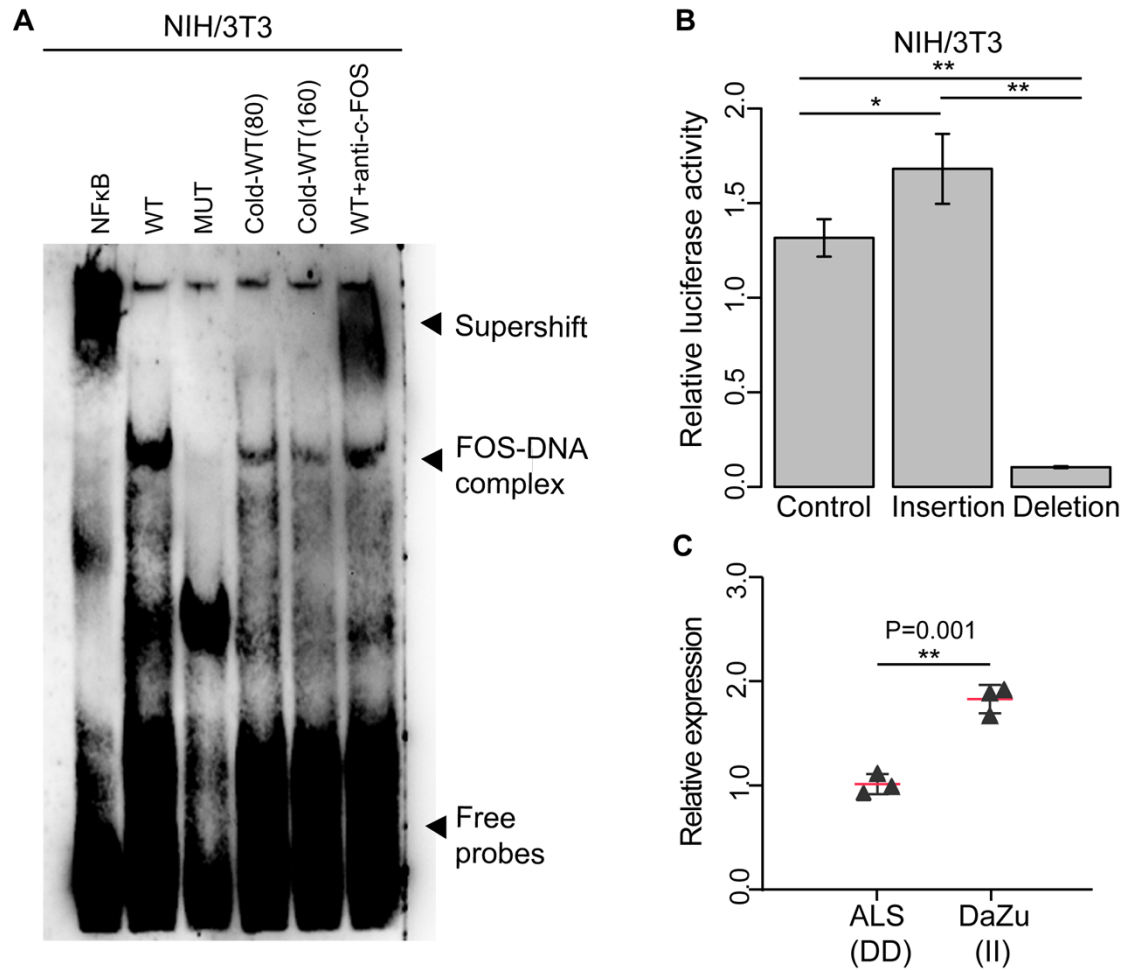

768

769 **Fig 5. Validation of the indel variant in the *FGF5* gene.**

770 (A) Electrophoretic mobility shift assays (EMSA) using the nuclear protein from NIH/3T3 cells.

771 NFκB acts as a positive control (lane 1). WT and MUT represent the probe containing the

772 wildtype FOS binding site and the probe excluding the FOS binding site (lane 2 and 3),

773 respectively. The cold competitions of the protein complex formation by 80 and 160 fold over that

774 of wildtype probe (lane 4 and 5). The clear supershift with anti-c-FOS antibody mixed to

775 wildtype react (lane 6). (B) Dual-luciferase activity assay of the NIH/3T3 cell lysates

776 cotransfected with the pGL4.74 internal reference plasmid and the pGL4.23 empty vector as

777 control, the pGL4.23 recombinant plasmids of the insertion or the deletion variant. (C) The qPCR

778 gene expression of the *FGF5* gene in the skin of ALS (Alashan cashmere goat) and DaZu black

779 goats (non-cashmere goat). \* and \*\* displayed the statistical significance of *P-values* <0.05 and

780 0.01, respectively.

781
